# Supplementary material
Source: PubMed Central journal article supplement (PMC2874159)
Supplement: NIHMS185953-supplement-01.pdf [file NIHMS185953-supplement-01.pdf]

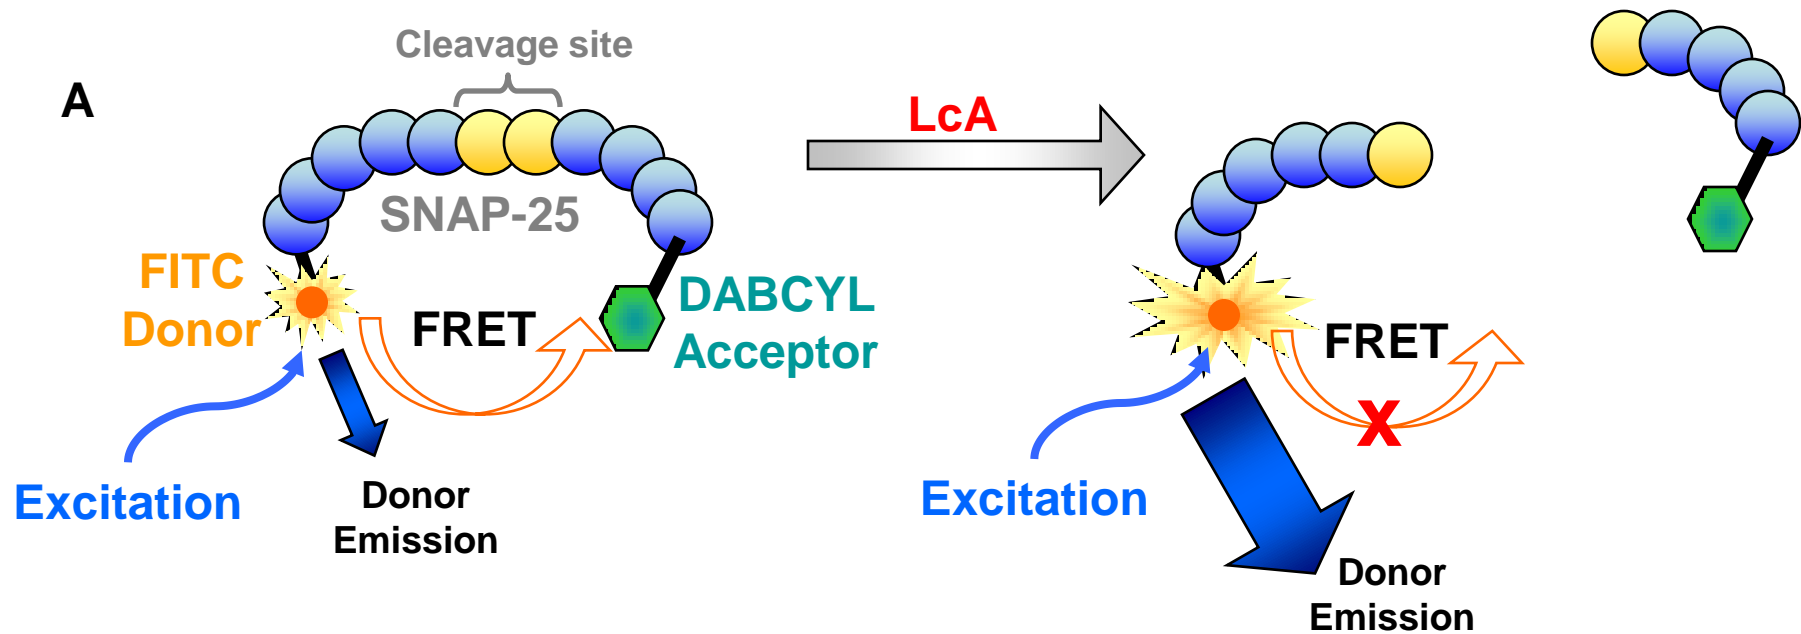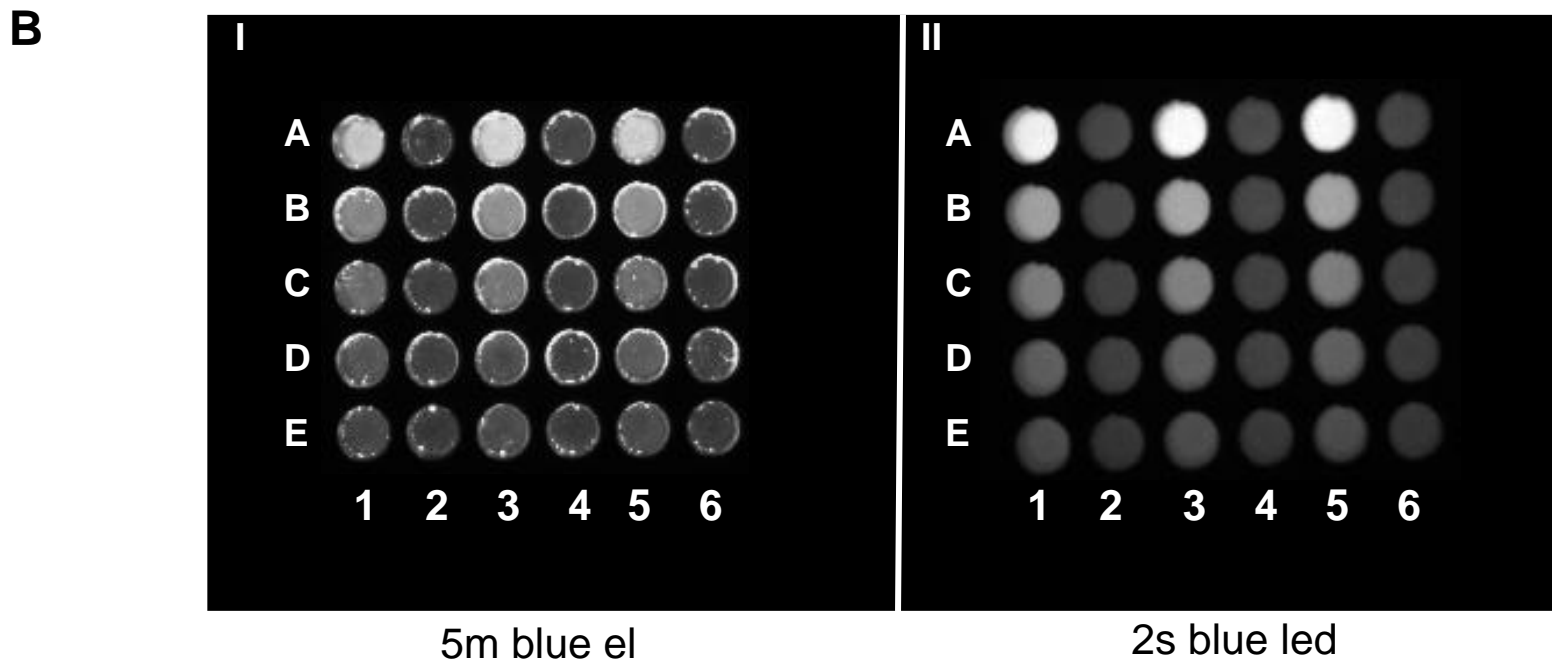

**Supporting information: Figure S1 FRET Scheme and LcA assays**

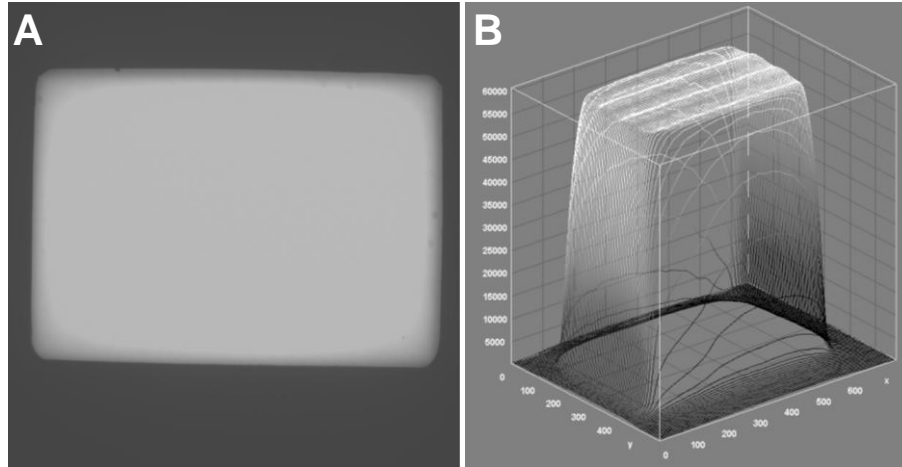

**Supporting information: Figure S2 uniform illumination analysis**

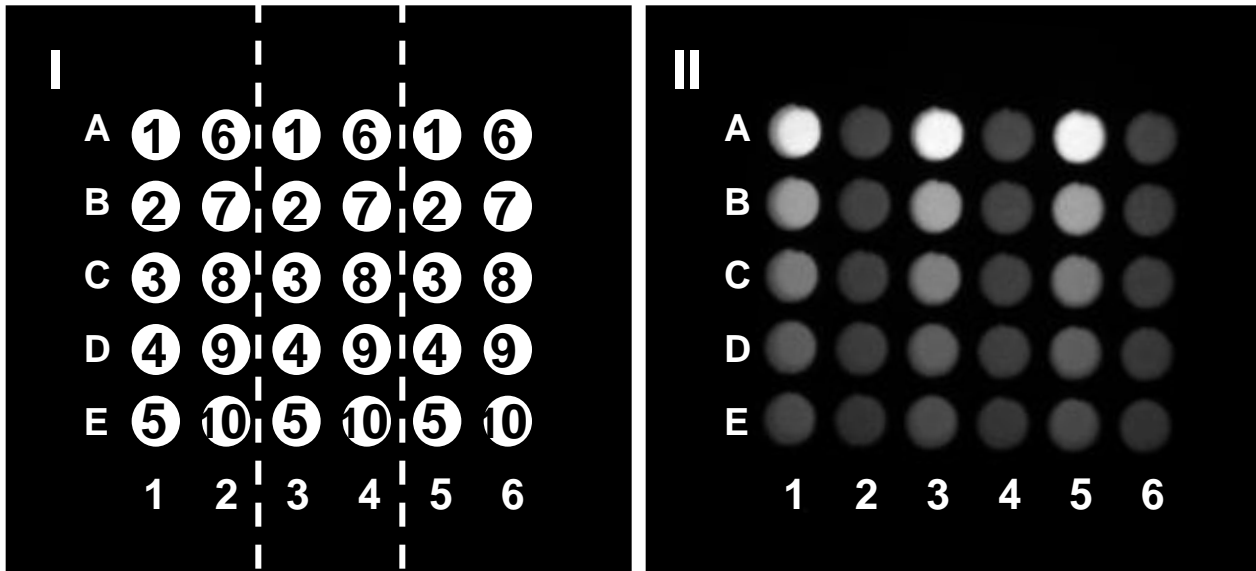

Supporting information: Figure S3 the layout of the chip
